# Supplementary material for: Use of E-Health in Dutch General Practice during the COVID-19 Pandemic
Source: Int J Environ Res Public Health. 2021 Nov 26;18(23):12479. doi: 10.3390/ijerph182312479 (PMC8656482; doi:10.3390/ijerph182312479)
Supplement: Supplementary file 1 [file ijerph-18-12479-s001.zip › ijerph-1411082-supplementary.pdf]

**File S1. Web survey e-health questions (April 2020)**

**1. What is your position within this general practice?**

- ☐ General practice owner / GP registrar of this practice
- ☐ Salaried general practitioner in this practice
- ☐ Locum in this practice
- ☐ Doctor's assistant / GP assistant
- ☐ Practice nurse
- ☐ Nursing specialist or physician assistant in this practice
- ☐ Practice manager within this practice
- ☐ Other, namely:\_\_\_\_\_

**2. Have you used (new) e-health applications in your practice because of the COVID-19 pandemic or have you started using existing applications more often? And do you think you will continue to use them more intensively? These can be, for example, electronic patient contact by means of e-consultation or video consultation, or electronic peer contact by means of teleconsultation.**

- ☐ No, I have not used new e-health applications nor I have started using existing e-health applications more often.
- ☐ Yes, namely:

|                                                                                            | We already used this applications, but started using it more intensively | We started using the following applications for the first time | We believe we will continue to use this application more intensively after the pandemic | Does not apply           |
|--------------------------------------------------------------------------------------------|--------------------------------------------------------------------------|----------------------------------------------------------------|-----------------------------------------------------------------------------------------|--------------------------|
| E-consultation                                                                             | <input type="checkbox"/>                                                 | <input type="checkbox"/>                                       | <input type="checkbox"/>                                                                | <input type="checkbox"/> |
| Online ordering of repeat prescriptions                                                    | <input type="checkbox"/>                                                 | <input type="checkbox"/>                                       | <input type="checkbox"/>                                                                | <input type="checkbox"/> |
| Video consultation with patients                                                           | <input type="checkbox"/>                                                 | <input type="checkbox"/>                                       | <input type="checkbox"/>                                                                | <input type="checkbox"/> |
| Teleconsultation (electronic peer contact)                                                 | <input type="checkbox"/>                                                 | <input type="checkbox"/>                                       | <input type="checkbox"/>                                                                | <input type="checkbox"/> |
| Telemonitoring (healthcare provider monitors online what the patient is measuring at home) | <input type="checkbox"/>                                                 | <input type="checkbox"/>                                       | <input type="checkbox"/>                                                                | <input type="checkbox"/> |
| Other, namely:_____                                                                        | <input type="checkbox"/>                                                 | <input type="checkbox"/>                                       | <input type="checkbox"/>                                                                | <input type="checkbox"/> |

**3. What is your position within this general practice?**

- ☐ General practice owner / GP registrar of this practice
- ☐ Salaried general practitioner in this practice
- ☐ Locum in this practice
- ☐ Doctor's assistant / GP assistant
- ☐ Practice nurse
- ☐ Nursing specialist or physician assistant in this practice
- ☐ Practice manager within this practice
- ☐ Other, namely:\_\_\_\_\_

**4. Which e-health applications does your practice use at the moment? You may select multiple answers.**

- ☐ E-consultation
- ☐ Request repeat prescriptions online
- ☐ Video consultation with patients
- ☐ Teleconsultation (electronic peer contact)
- ☐ Telemonitoring (healthcare provider monitors online what the patient measures at home)
- ☐ None of the above e-health applications
- ☐ Other e-health applications, namely:\_\_\_\_\_

**5. If you selected 'None of the above e-health applications' can you explain your answer? How did you organize 'remote healthcare' differently in your practice during the COVID-19 pandemic?**

**6. Which of the following e-health applications have you continued to use more intensive in your practice, now that the first wave of the COVID-19 pandemic is over? And which of the following e-health applications do you think you will continue to use more intensively in the future? You may select multiple answers.**

|                                         | We have started using more intensively | We think we will continue to use more intensively | We have not started using more intensively or we do not think we will continue to use them more intensively |
|-----------------------------------------|----------------------------------------|---------------------------------------------------|-------------------------------------------------------------------------------------------------------------|
| E-consultation                          | <input type="checkbox"/>               | <input type="checkbox"/>                          | <input type="checkbox"/>                                                                                    |
| Online ordering of repeat prescriptions | <input type="checkbox"/>               | <input type="checkbox"/>                          | <input type="checkbox"/>                                                                                    |
| Video consultation with patients        | <input type="checkbox"/>               | <input type="checkbox"/>                          | <input type="checkbox"/>                                                                                    |
| Teleconsultation                        | <input type="checkbox"/>               | <input type="checkbox"/>                          | <input type="checkbox"/>                                                                                    |
| Telemonitoring                          | <input type="checkbox"/>               | <input type="checkbox"/>                          | <input type="checkbox"/>                                                                                    |
| Other, namely:_____                     | <input type="checkbox"/>               | <input type="checkbox"/>                          | <input type="checkbox"/>                                                                                    |

**Table S1.** Respondent's position within the general practice (April 2020 and July 2020)

| Position                                  | April 2020<br>(n=1,598)* | July 2020<br>(n=843)* |
|-------------------------------------------|--------------------------|-----------------------|
| General practice owner                    | 85%                      | 76%                   |
| Salaried/employed general practitioner    | 2%                       | 3%                    |
| General practitioner locum                | 1%                       | 1%                    |
| General practitioner assistant            | 4%                       | 6%                    |
| Practice nurse and/or nurse practitioner  | 1%                       | 1%                    |
| Nursing specialist or physician assistant | 0%                       | 0%                    |
| Practice manager                          | 6%                       | 12%                   |
| Other position                            | 1%                       | 1%                    |

\*Response numbers are based on question 1 from File S1 and question 3 from File S2, which were the first questions of the complete surveys in April and July 2020.

**Table S2.** Differences in practice types between general practices in practice sample and population (April 2020 and July 2020).

| Practice type | Sample April<br>(n=1,427) | Sample July<br>(n=735) | Population<br>(n=4,911)* |
|---------------|---------------------------|------------------------|--------------------------|
| Solo          | 20.3%                     | 20.2%                  | 24.0%                    |
| Duo           | 45.4%                     | 41.4%                  | 43.9%                    |
| Group         | 34.4%                     | 38.4%                  | 32.1%                    |

\*based on the 'Healthcare Professionals Registries'[8]

**Table S3.** Percentage of practices indicating intensified use of existing e-health applications because of the COVID-19 pandemic, specified by e-health application (mean  $\pm$  standard deviation), April 2020.

| E-health application                    | Solo practice<br>(n=211) | Duo practice<br>(n=480) | Group practice<br>(n=383) | p-Value |
|-----------------------------------------|--------------------------|-------------------------|---------------------------|---------|
| E-consultation                          | 65% $\pm$ 0.477          | 73% $\pm$ 0.443         | 77% $\pm$ 0.421           | 0.009*  |
| Online ordering of repeat prescriptions | 66% $\pm$ 0.475          | 70% $\pm$ 0.459         | 69% $\pm$ 0.464           | 0.561   |
| Video consultation                      | 13% $\pm$ 0.340          | 10% $\pm$ 0.300         | 12% $\pm$ 0.326           | 0.406   |
| Teleconsultation                        | 46% $\pm$ 0.500          | 53% $\pm$ 0.500         | 55% $\pm$ 0.498           | 0.095   |
| Telemonitoring                          | 15% $\pm$ 0.360          | 12% $\pm$ 0.329         | 14% $\pm$ 0.346           | 0.567   |
| Other                                   | 5% $\pm$ 0.213           | 6% $\pm$ 0.235          | 6% $\pm$ 0.238            | 0.801   |

One-way ANOVA was used to test differences in the mean use of specific e-health applications between the three practice types. \* Indicates a significant difference ( $p < 0.05$ ) between the mean values of the three practice types.

**Table S4.** Percentage of practices indicating intensified use of existing e-health applications because of the COVID-19 pandemic, specified by e-health application (mean  $\pm$  standard deviation), July 2020.

| E-health application                    | Solo practice<br>(n=11-123) | Duo practice<br>(n=15-266) | Group practice<br>(n=27-247) | p-Value |
|-----------------------------------------|-----------------------------|----------------------------|------------------------------|---------|
| E-consultation                          | 64% $\pm$ 0.481             | 72% $\pm$ 0.449            | 69% $\pm$ 0.462              | 0.299   |
| Online ordering of repeat prescriptions | 42% $\pm$ 0.496             | 39% $\pm$ 0.488            | 40% $\pm$ 0.491              | 0.814   |
| Video consultation                      | 49% $\pm$ 0.504             | 62% $\pm$ 0.487            | 61% $\pm$ 0.490              | 0.197   |
| Teleconsultation                        | 37% $\pm$ 0.486             | 43% $\pm$ 0.496            | 44% $\pm$ 0.497              | 0.569   |
| Telemonitoring                          | 33% $\pm$ 0.492             | 53% $\pm$ 0.506            | 54% $\pm$ 0.505              | 0.442   |
| Other                                   | 45% $\pm$ 0.522             | 47% $\pm$ 0.516            | 67% $\pm$ 0.480              | 0.334   |

One-way ANOVA was used to test differences in the mean use of specific e-health applications between the three practice types. \* Indicates a significant difference ( $p < 0.05$ ) between the mean values of the three practice types. The amount of practices (n) that answered this question in July differed, depending on how many practices were using the specific e-health applications.

**Table S5.** Percentage of practices indicating they will continue the intensified use of an e-health application after the COVID-19 pandemic, specified by e-health application (mean  $\pm$  standard deviation), April 2020.

| E-health application                    | Solo practice<br>(n=211) | Duo practice<br>(n=480) | Group practice<br>(n=383) | p-Value |
|-----------------------------------------|--------------------------|-------------------------|---------------------------|---------|
| E-consultation                          | 26% $\pm$ 0.440          | 25% $\pm$ 0.433         | 28% $\pm$ 0.448           | 0.674   |
| Online ordering of repeat prescriptions | 14% $\pm$ 0.350          | 13% $\pm$ 0.340         | 15% $\pm$ 0.354           | 0.858   |
| Video consultation                      | 23% $\pm$ 0.423          | 26% $\pm$ 0.439         | 32% $\pm$ 0.468           | 0.039*  |
| Teleconsultation                        | 17% $\pm$ 0.377          | 15% $\pm$ 0.353         | 19% $\pm$ 0.393           | 0.212   |
| Telemonitoring                          | 12% $\pm$ 0.329          | 5% $\pm$ 0.218          | 7% $\pm$ 0.256            | 0.003*  |
| Other                                   | 3% $\pm$ 0.167           | 2% $\pm$ 0.150          | 4% $\pm$ 0.194            | 0.367   |

One-way ANOVA was used to test differences in the mean use of specific e-health applications between the three practice types. \* Indicates a significant difference ( $p < 0.05$ ) between the mean values of the three practice types.

**Table S6.** Percentage of practices indicating they will continue the intensified use of an e-health application after the COVID-19 pandemic, specified by e-health application (mean  $\pm$  standard deviation), July 2020.

| E-health application                    | Solo practice<br>(n=11-123) | Duo practice<br>(n=15-266) | Group practice<br>(n=27-247) | p-Value |
|-----------------------------------------|-----------------------------|----------------------------|------------------------------|---------|
| E-consultation                          | 41% $\pm$ 0.495             | 38% $\pm$ 0.487            | 36% $\pm$ 0.480              | 0.567   |
| Online ordering of repeat prescriptions | 31% $\pm$ 0.463             | 30% $\pm$ 0.459            | 20% $\pm$ 0.400              | 0.015*  |
| Video consultation                      | 42% $\pm$ 0.497             | 38% $\pm$ 0.487            | 35% $\pm$ 0.479              | 0.646   |
| Teleconsultation                        | 33% $\pm$ 0.473             | 38% $\pm$ 0.486            | 31% $\pm$ 0.464              | 0.349   |
| Telemonitoring                          | 58% $\pm$ 0.515             | 39% $\pm$ 0.494            | 46% $\pm$ 0.505              | 0.502   |
| Other                                   | 64% $\pm$ 0.505             | 47% $\pm$ 0.516            | 41% $\pm$ 0.501              | 0.454   |

One-way ANOVA was used to test differences in the mean use of specific e-health applications between the three practice types. \* Indicates a significant difference ( $p < 0.05$ ) between the mean values of the three practice types. The amount of practices (n) that answered this question in July differed, depending on how many practices were using the specific e-health applications.
